# Supplementary material
Source: PubMed Central journal article supplement (PMC1796928)
Supplement: pbio.0050034.sg001.pdf [file pbio.0050034.sg001.pdf]

Figure S1

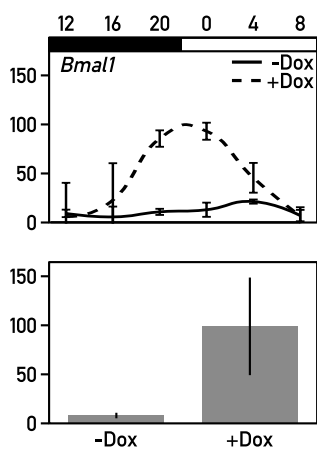

**Figure S1:** Quantification of *Bmall* protein levels in *TRE-Rev-erb $\alpha$ /LAP-tTA* transgenic mice. Upper panel: RT-TaqMan qPCR was performed for *Bmall* mRNA employing the cDNAs used for the data presented in figure 2. Integration of the qPCR signals revealed a decrease of four fold for *Bmall* mRNA in mice overexpressing HA-REV-ERB $\alpha$ .

Lower panel: densitometry analysis of the Western signals shown in Figure 1C. Since the BMAL1 protein does not show a significant circadian variation in abundance, all 6 time points of the –Dox (left) and +Dox (right) have been averaged and the standard deviation is represented by the error bar. This analysis suggests tha BMAL1 protein expression is downregulated about 12 fold by HA-REV-ERB $\alpha$  overexpression.
