# Supplementary material
Source: PubMed Central journal article supplement (PMC1796928)
Supplement: pbio.0050034.sg002.pdf [file pbio.0050034.sg002.pdf]

Figure S2

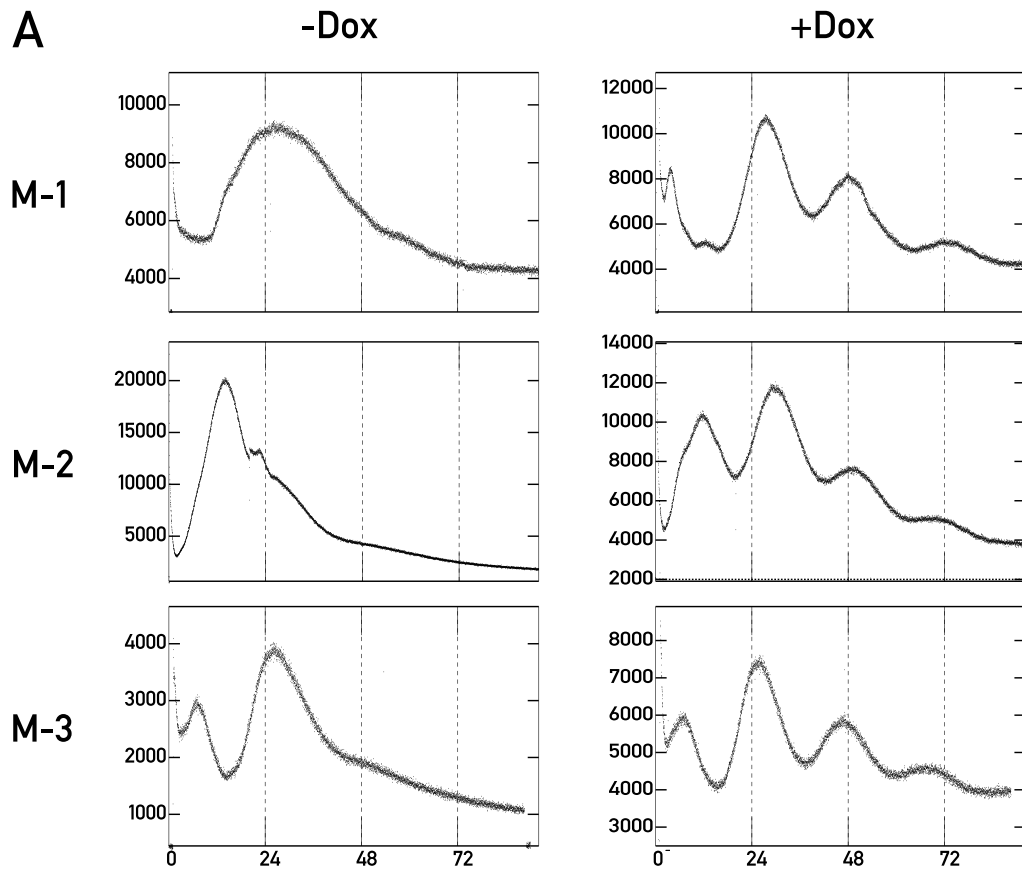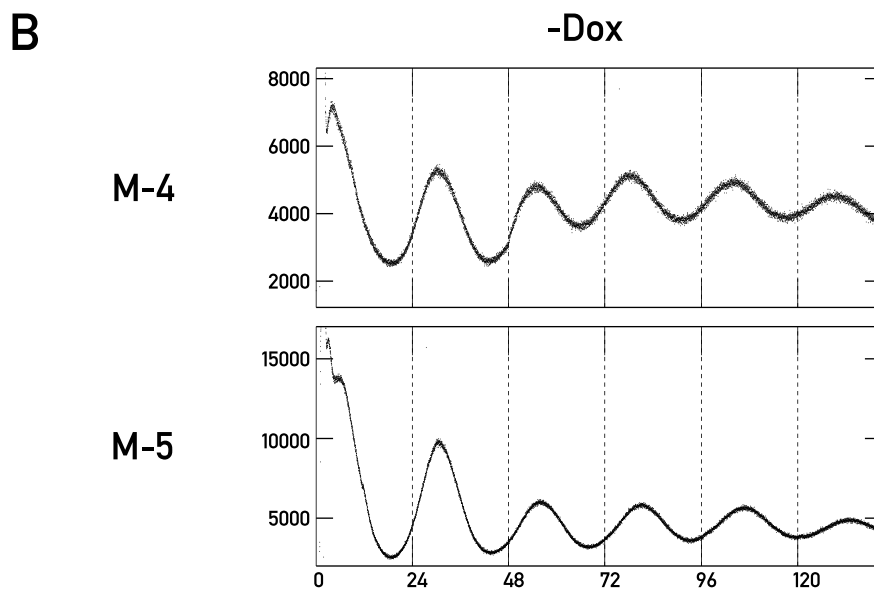

**Figure S2:** Temporal luminescence profiles of liver and lung explants from triple heterozygous *TRE-Rev-erb $\alpha$ /LAP-tTA/mPer2::luc* triple transgenic mice.

A) Liver slices were cultured in luciferin-containing medium in the absence (-Dox) or presence of 10  $\mu$ g/ml Dox (+Dox). Luminescence was recorded using photomultiplier tubes. Slices from the liver of three different mouse individuals (M-1, M-2, M-3) are presented, and the results obtained for untreated and Dox-treated explants from these livers are shown in the left and right panels, respectively. Circadian luminescence cycles are only observed with the Dox-treated explants. The data obtained with mice heterozygous for the *TRE-Rev-erb $\alpha$*  and *LAP-tTA* transgenes are basically the same as those shown in Figure 3 obtained with mice homozygous for these transgenes. Hence, even in liver explants from heterozygous animals the downregulation of *Bmall* transcription in the absence of Dox is sufficient to abolish circadian *mPer2::luc* expression.

B) Luminescence cycles obtained with lung explants from two triple heterozygous individuals (M-4, M-5) cultured in the absence of Dox are shown. Since lung cells do not express the *LAP-tTA* transgene, circadian *mPer2::luc* expression persists in the absence of Dox. Note that lung slices yield more robust luminescence cycles and survive longer in culture than liver slices. This probably reflects the high surface/volume ratio of pulmonary tissue, assuring sufficient oxygen and nutrient supply to most cells of the explant during extended time periods.
