# Supplementary material
Source: PubMed Central journal article supplement (PMC1796928)
Supplement: pbio.0050034.sg004.pdf [file pbio.0050034.sg004.pdf]

Figure S4

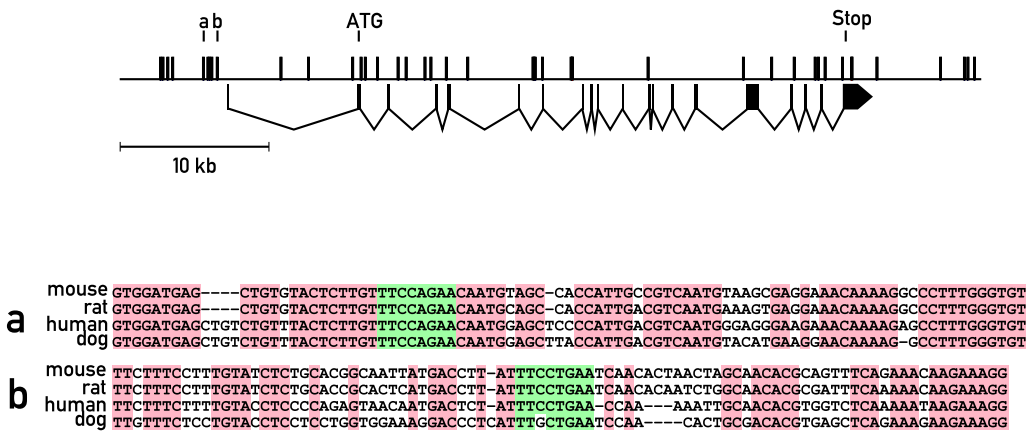

**Figure S4:** Identification of potential HSF binding sites in the *mPer2* gene.

The sequence motifs GAANNTTC and TTCNNGAA within *mPer2* gene and flanking sequences are represented by black vertical bars. The exon-intron pattern of *mPer2* pre-mRNA is depicted below the map.

The alignment of two highly conserved regions (a and b on the upper map) is shown. The green boxes correspond to the potential HSF binding sites.
