# Supplementary material
Source: PubMed Central journal article supplement (PMC1796928)
Supplement: pbio.0050034.st001.pdf [file pbio.0050034.st001.pdf]

**Table S1: PCR primers and probes used in this study**

| <b>primer</b>                  | <b>sequence (5' to 3')</b>                |
|--------------------------------|-------------------------------------------|
| Bcl1-HA-Rev $\alpha$           | AGGTGATCACCGCCATGGCTTACCC                 |
| Bcl1-downstream-Rev $\alpha$   | AGGTGATCACTACTGGGCGTCCACC                 |
| TRE-fwd                        | AGCAGAGCTCGTTTAGTGAACC                    |
| TRE-rev                        | CACTGATAGGGAGTGGTA                        |
| pLAP-fwd                       | TGACAGGCATGGCCTATTGA                      |
| pLAP-rev                       | GGCTGGCCTTGAACCTAGAA                      |
| LAPtTA <sub>g</sub> -fwd       | TCTCACTCGGAAGGACAT                        |
| LAP-tTA <sub>w</sub> -fwd2     | TCTGAGCATGGCCTCTAA                        |
| LAPtTA-rev2                    | GCTGGAGTAAATTTACAGTG                      |
| twdTRE                         | ACCGTACACGCCTACTCGAC                      |
| TRE <sub>valpha</sub> WT2      | AGCACCACTGTGAGTTGGTT                      |
| TRE <sub>valpha</sub> -rev2    | CCAGTCTCTGGAACATTCTC                      |
| TaqMan Bmal1-fwd               | CCAAGAAAGTATGGACACAGACAAA                 |
| TaqMan Bmal1-rev               | GCATTCTTGATCCTTCCTTGGT                    |
| TaqMan Bmal1-probe             | FAM-TGACCCTCATGGAAGGTTAGAATATGCAGAA-TAMRA |
| TaqMan Cry1-fwd                | CTGGCGTGGAAGTCATCGT                       |
| TaqMan Cry1-rev                | CTGTCCGCCATTGAGTTCTATG                    |
| TaqMan Cry1-probe              | FAM-CGCATTTACATACACTGTATGACCTGGACA-TAMRA  |
| TaqMan Cry2-fwd                | TGTCCCTTCCTGTGTGGAAGA                     |
| TaqMan Cry2-rev                | GCTCCAGCTTGGCTTGA                         |
| TaqMan Cry2-probe              | FAM-CAGTCACCCTGTGGCAGAGCCTGG-TAMRA        |
| TaqMan Dbp-fwd                 | CGTGGAGGTGCTTAATGACCTTT                   |
| TaqMan Dbp-rev                 | CATGGCCTGGAATGCTTGA                       |
| TaqMan Dbp-probe               | FAM-AACCTGATCCCGCTGATCTCGCC-TAMRA         |
| TaqMan Per1-fwd                | ACCAGCGTGTGATGATGACATAC                   |
| TaqMan Per1-rev                | CTCTCCCGGTCTTGCTTCAG                      |
| TaqMan Per1-probe              | FAM-CCGTCCAGGGATGCAGCCTCTG-TAMRA          |
| TaqMan Per2-fwd                | ATGCTCGCCATCCACAAGA                       |
| TaqMan Per2-rev                | GCGGAATCGAATGGGAGAAT                      |
| TaqMan Per2-probe              | FAM-ATCCTACAGGCCGGTGGACAGCC-TAMRA         |
| TaqMan mREV-ERB $\alpha$ -fwd  | CATGGTGCTACTGTGTAAGGTGTGT                 |
| TaqMan rREV-ERB $\alpha$ -fwd  | CATGGTGCTACTGTGTAAAGTGTGT                 |
| TaqMan mREV-ERB $\alpha$ -rev  | CACAGGCGTGCCTCCATAG                       |
| TaqMan rREV-ERB $\alpha$ -rev  | CGCAGGCATGCACGCCATAG                      |
| TaqMan REV-ERB $\alpha$ -probe | FAM-ACGTGGCCTCAGGC-MGB                    |
| TaqMan tbp-fwd                 | TTGACCTAAAGACCATTGCCTTC                   |
| TaqMan tbp-rev                 | TTCTCATGATGACTGCAGCAAA                    |
| TaqMan tbp-probe               | FAM-TGCAAGAAATGCTGAATATAATCCCAAGCG-TAMRA  |
